# Supplementary material for: Birds invest wingbeats to keep a steady head and reap the ultimate benefits of flying together
Source: PLoS Biol. 2019 Jun 18;17(6):e3000299. doi: 10.1371/journal.pbio.3000299 (PMC6581236; doi:10.1371/journal.pbio.3000299)
Supplement: S1 Table — Corrected solo mean values refer to the mean of the median value from each individual, which has been corrected for the effects of airspeed, wind support, crosswind, temperature, humidity, and air density according to the results of the model. Note: the covariates in this table are the difference per unit difference in the covariate. Data deposited in S1 Data and model code deposited in S2 Text. (XLSX) [file pbio.3000299.s006.xlsx]

## Sheet: Sheet1
Variable	Corrected solo mean	Difference from solo for birds of the same tarsus length		Difference per mm difference in tarsus length		Covariates: Difference per unit difference in
		Mean ∆ [95% CrI]	%	Mean ∆ [95% CrI]	%	Wind support (m s-1) [95% CrI]	Crosswind (m s-1) [95% CrI]	Temperature (oC) [95% CrI]	Humidity (%) [95% CrI]	Air density (kg m-3) [95% CrI]	Airspeed (m s-1) [95% CrI]	Date of release
						max = 5.10 m s-1	max = 4.47 m s-1	max = 29.4 oC	max = 74 %	max = 1.25 kg m-3	max = 27.63 m s-1
						min = -3.00 m s-1	min = 0.31 m s-1	min = 14.2 oC	min = 31 %	min = 1.15 kg m-3	min = 15.46 m s-1
Median wingbeat frequency (Hz)	5.48	1.00 [0.60, 1.38]	18.24	0.01 [-0.13, 0.16]	0.27	0.03 [-0.02, 0.07]	0.02 [-0.01, 0.05]	0.01 [-0.02, 0.04]	0.00 [-0.01, 0.01]	-0.41 [-1.17, 0.35]	0.01 [-0.01, 0.03]	Min: -0.40 Max: 0.44
Standard deviation of wingbeat frequency (Hz)	0.6	-0.01 [-0.11, 0.09]	-2.04	0.02 [-0.15, 0.18]	3.72	-0.01 [-0.04, 0.01]	0.00 [-0.02, 0.02]	0.02 [0.00, 0.03]	0.00 [0.00, 0.01]	-0.55 [-0.98, -0.12]	0.01 [0.00, 0.03]	Min: -0.19 Max: 0.21
Median downstroke phase duration (ms)	47.51	-3.55 [-8.60, 1.67]	-7.48	0.39 [-1.69, 2.57]	0.81	-0.06 [-0.64, 0.52]	0.04 [-0.25, 0.34]	-0.04 [-0.21, 0.14]	-0.02 [-0.06, 0.02]	1.09 [-2.56, 4.74]	0.05 [-0.16, 0.26]	Min: -2.61 Max: 1.62
Median upstroke phase duration (ms)	136.09	-28.63 [-36.66, -20.36]	-21.04	-0.06 [-4.10, 3.91]	-0.04	0.12 [-1.12, 1.36]	0.68 [0.10, 1.26]	-0.28 [-0.60, 0.04]	0.02 [-0.07, 0.11]	-0.78 [-6.76, 5.25]	0.47 [0.05, 0.89]	Min: -8.34 Max: 7.21
Median peak-to-peak DB acceleration (g)	3.65	0.16 [-0.16, 0.47]	4.27	0.00 [-0.33, 0.34]	-0.03	0.01 [-0.07, 0.09]	-0.02 [-0.07, 0.03]	-0.01 [-0.06, 0.03]	0.00 [-0.01, 0.01]	-0.31 [-1.32, 0.72]	0.03 [0.00, 0.07]	Min: -0.37 Max: 0.48
Median DB amplitude (mm)	20.68	-4.65 [-6.21, -3.06]	-22.47	0.01 [-0.61, 0.57]	0.07	-0.09 [-0.34, 0.16]	0.09 [-0.06, 0.24]	-0.09 [-0.20, 0.01]	0.00 [-0.02, 0.02]	-0.33 [-2.75, 2.12]	0.14 [0.04, 0.24]	Min: -1.62 Max: 2.30
Airspeed (m s-1)	19.55	0.63 [0.07, 1.19]	3.25	-0.31 [-0.64, 0.06]	-1.6	-0.11 [-0.31, 0.08]	-0.76 [-0.86, -0.65]	-0.03 [-0.11, 0.05]	0.01 [0.00, 0.03]	0.76 [-1.25, 2.73]	N/A	Min: -4.24 Max: 4.92
Route accuracy	0.8	0.06 [0.01, 0.10]	6.96	0.00 [-0.02, 0.03]	0.06	-0.01 [-0.02, 0.00]	0.02 [0.01, 0.03]	0.00 [-0.01, 0.01]	0.00 [0.00, 0.00]	-0.23 [-0.50, 0.03]	0.01 [0.01, 0.02]	Min: -0.17 Max: 0.10
